# Supplementary material for: Estimation of hazard assessment by FINSIM for west coast and son narmada faults
Source: Copernicus journal article supplement (doi:10.5194/nhess-2018-1), 2018-02-12
Supplement: Supplementary file [file nhess-2018-1-RC2-supplement.pdf]

The manuscript "Estimation of hazard assessment by FINSIM for the west coast and son narmada faults" by Shivamant Angadi and Mayank I feel that the manuscript in present form can not be published in Nat. Hazards Earth Syst. Sci .. I suggest to reject it, considering that a great amount of work is actually necessary to improve the manuscript. Some general suggestions:

### **Abstract**

- The abstract contains information such as the name of “zonal area” that international reader doesn’t know. This information should be specified in other parts of the manuscript.
- Usually, references are not quoted in the abstract.

### **The Study Area and Geographical Details**

- This section needs a picture showing the quoted locations. Moreover, other information on the general seismic hazard (e.g. active faults, past earthquakes, density of inhabitants, ... )

### **Methodology**

- No information are given on source parameters, attenuation and site effects used. Although, in the abstract authors write about site effects estimate made using shear wave velocity measurements and SPT. Some data are in the table, but are quoted in the text in other sections.

### **General comments**

- Several sections could be merged.
- English language need revisions.
- The manuscript seem to be an abstract. Some sections should be improved, adding more details.
- In the conclusions the authors should describe the novelty of their approach in seismic hazard computation.
- Figure captions should be improved adding details.
- Pictures need revisions, especially as concern their layout
